# Supplementary material for: Exposure to hycanthone alters chromatin structure around specific gene functions and specific repeats in Schistosoma mansoni
Source: Front Genet. 2014 Jul 16;5:207. doi: 10.3389/fgene.2014.00207 (PMC4099960; doi:10.3389/fgene.2014.00207)
Supplement: Supplementary file 2 [file DataSheet1.XLSX]

## Sheet: Table 1
Supplementary Table 1
List of regions and associated genes where histone marks profiles were different between hycanthone resistant and control worms. Scafolds and positions refers to the genome assembly v5.2 of Schistosoma mansoni.
Histone mark	Scaffold	Start	End	Region	Associated Gene	Gene Description (From GeneDB)
H3K4me3	Schisto_mansoni.Chr_1.unplaced.SC_0135	793968	800000	Intergenic
	Schisto_mansoni.Chr_3.unplaced.SC_0233	20698	22194	Intergenic
	Schisto_mansoni.Chr_1.unplaced.SC_0010	2553602	2554446	TSS	Smp_000020	bifunctional protein NCOAT
	Schisto_mansoni.Chr_2	12959651	12960074	TSS	Smp_014850	NCK adaptor protein
	Schisto_mansoni.Chr_3	24461398	24461588	TSS	Smp_018990	ribosomal protein L9
	Schisto_mansoni.Chr_W	51047380	51047778	TSS	Smp_032480	cohesin subunit SA 1
	Schisto_mansoni.Chr_2	13759183	13759612	TSS	Smp_048940	Vacuolar protein sorting associated protein
	Schisto_mansoni.SC_0186	208884	209950	TSS	Smp_070110	mitochondrial 39s ribosomal protein l45
	Schisto_mansoni.SC_0150	631699	632033	TSS	Smp_070610.1	mps one binder kinase activator 1
	Schisto_mansoni.SC_0013	3568161	3568700	Intergenic
	Schisto_mansoni.Chr_1	37187228	37187692	TSS	Smp_083740	centrin 3
	Schisto_mansoni.SC_0132	859293	859739	TSS	Smp_090030	rRNA processing protein Nop9
	Schisto_mansoni.Chr_6	4219571	4219898	TSS	Smp_091650	phospholipid transporting ATPase IIB
	Schisto_mansoni.Chr_W	44735058	44735396	TSS	Smp_096670	serine:threonine protein kinase PAK 1
	Schisto_mansoni.SC_0207	341233	342296	TSS	Smp_098370.1	uncharacterized aarF domain containing protein
	Schisto_mansoni.Chr_2	19396719	19397798	TSS	Smp_104360	hypothetical protein
	Schisto_mansoni.Chr_2	24683464	24684998	TSS	Smp_135080.1	microtubule associated protein 1A
	Schisto_mansoni.Chr_3	13232551	13233800	TSS	Smp_136410	cytoplasmic polyadenylation element binding
	Schisto_mansoni.Chr_6	16062714	16064250	TSS	Smp_136660	pro neuregulin 2
	Schisto_mansoni.Chr_3	23106561	23107580	TSS	Smp_213390	ribosomal protein s6 kinase beta 1
					Smp_213400	e3 ubiquitin-protein ligase bre1
	Schisto_mansoni.Chr_W	7385089	7385499	TSS	Smp_139090.1	DENN domain containing protein 5B
	Schisto_mansoni.Chr_W	15578849	15579931	TSS	Smp_142190	carboxypeptidase n catalytic chain
	Schisto_mansoni.Chr_4.unplaced.SC_0032	1147948	1148467	TSS	Smp_148940	sorting nexin
	Schisto_mansoni.Chr_4.unplaced.SC_0032	558558	558820	TSS	Smp_149050.1	XTP3 transactivated gene B protein
	Schisto_mansoni.SC_0214	214642	215449	TSS	Smp_151380	anaphase promoting complex subunit 1
	Schisto_mansoni.Chr_W	31380464	31380941	TSS	Smp_153480	solute carrier family 12
	Schisto_mansoni.SC_0223	237419	237884	TSS	Smp_159890	carboxypeptidase d
	Schisto_mansoni.Chr_3.unplaced.SC_0077	29872	35737	TSS	Smp_160040	Abnormal long morphology protein 1
	Schisto_mansoni.Chr_1	23093504	23093979	TSS	Smp_160970	hypothetical protein
	Schisto_mansoni.Chr_1	51279957	51280469	TSS	Smp_161370	deoxynucleotidyltransferase terminal interacting
	Schisto_mansoni.Chr_1	25844210	25845022	TSS	Smp_161860	run domain Beclin 1 interacting and cystein rich
	Schisto_mansoni.SC_0138	90963	92283	TSS	Smp_164450.1	tether containing UBX domain for GLUT4
	Schisto_mansoni.Chr_3	6256205	6256507	TSS	Smp_165770	nucleotide binding protein 1
	Schisto_mansoni.Chr_3.unplaced.SC_0174	515846	517102	TSS	Smp_165900	n2n2 dimethylguanosine tRNA methyltranserase
	Schisto_mansoni.SC_0357	29301	40000	TSS	Smp_170820	ATP binding cassette subfamily B (MDR:TAP)
	Schisto_mansoni.Chr_2.unplaced.SC_0193	56023	56552	TSS	Smp_171530	alpha parvin
	Schisto_mansoni.Chr_2.unplaced.SC_0193	110458	111496	TSS	Smp_171540.1	Ribosome binding protein 1
	Schisto_mansoni.Chr_1	28371135	28371702	TSS	Smp_172420	E3 ubiquitin protein ligase TRIP12
	Schisto_mansoni.Chr_4.unplaced.SC_0032	1535582	1539567	TSS	Smp_172590	family S10 unassigned peptidase (S10 family)
	Schisto_mansoni.Chr_W	14390470	14391611	TSS	Smp_175090.1	long-chain-fatty-acid--CoA ligase
	Schisto_mansoni.SC_0151	547304	550107	TSS	Smp_175120.1	Alpha (1,6) fucosyltransferase (EC 2
	Schisto_mansoni.Chr_2	32642153	32643254	TSS	Smp_180990	heat shock proteinB1 associated protein 1
					Smp_181000	ubiquitin thioesterase otu1
	Schisto_mansoni.Chr_4	30796304	30796786	TSS	Smp_198010	arf GAP with GTPase, ANK repeat and PH
	Schisto_mansoni.SC_0393	29272	30708	TSS	Smp_199670	cation transporting ATPase
	Schisto_mansoni.SC_0221	154482	156140	TSS	Smp_205070	hypothetical protein
	Schisto_mansoni.Chr_5	9174658	9175267	Exon	Smp_210130	C Jun amino terminal kinase interacting protein
	Schisto_mansoni.Chr_4.unplaced.SC_0032	1596005	1600000	TSS	Smp_211180	alpha(13)fucosyltransferase
H3K9Ac	Schisto_mansoni.Chr_3	1370338	1371116	Intergenic
	Schisto_mansoni.Chr_4	4874988	4875379	Intergenic
	Schisto_mansoni.Chr_6	1733270	1733941	Intergenic
	Schisto_mansoni.Chr_1	57281606	57282474	Exon	smp_196370	potassium voltage gated channel subfamily H
	Schisto_mansoni.Chr_W	22785725	22787129	Intergenic
H3K9me3	Schisto_mansoni.Chr_2	12214549	12215081	exon	Smp_014570.1	Saposin,IPR008139 Saposin
	Schisto_mansoni.Chr_1.unplaced.SC_0071	1531043	1531341	intron	Smp_075940	prohibitin protein WPH
	Schisto_mansoni.Chr_3	18283100	18284075	intron	Smp_084890	ectonucleotide pyrophosphatase:phosphodiesterase
	Schisto_mansoni.Chr_1	30851010	30852524	5' end	Smp_093980	hypothetical protein
	Schisto_mansoni.SC_0080	999585	1000073	3' end	Smp_133490	mitogen activated protein kinase 15
	Schisto_mansoni.Chr_7	6998392	6998741	intron	Smp_134560	serine:threonine protein kinase doa
	Schisto_mansoni.Chr_1	13972042	13972891	5'gene	Smp_141250	protein jagged 1
	Schisto_mansoni.Chr_2	11730991	11731254	exon	Smp_146570	hypothetical protein
	Schisto_mansoni.SC_0142	506493	506899	intron	Smp_158580	transmembrane protein 39a
	Schisto_mansoni.Chr_4	16199908	16200561	intron	Smp_160670	paired box protein pax 6
	Schisto_mansoni.Chr_1	24876731	24877219	intron	Smp_161680	phosphorylase B kinase beta, kpbb
	Schisto_mansoni.Chr_W	252207	252845	exon	Smp_175930	ELAVprotein 2:3:4
H3K27me3	Schisto_mansoni.Chr_3	18098105	18099549	Intergenic
	Schisto_mansoni.Chr_4	16750925	16752331	exon	Smp_171740	multidrug resistance associated protein 1
	Schisto_mansoni.Chr_W	9836427	9837293	Intergenic
	Schisto_mansoni.Chr_4	23526845	23530256	Intergenic
	Schisto_mansoni.Chr_1.unplaced.SC_0010	3860276	3860997	Intergenic
